# Supplementary material for: The Mechanistic Perspective of Bilobetin Protective Effects against Cisplatin-Induced Testicular Toxicity: Role of Nrf-2/Keap-1 Signaling, Inflammation, and Apoptosis
Source: MDPI journal article supplement (doi:10.3390/biomedicines10051134), 2022-05-13
Supplement: s1 [file s1]

**Supplementary Table S1.** Primers used and their sequence

| Gene          | Probes                                                            |
|---------------|-------------------------------------------------------------------|
| VCAM-1        | 5'-TCTTACCTGTGCGCTGTGAC-3')<br>5'-ACATAAATGCCGGAATCGTC-3')        |
| Nrf2          | ACACGGTCCACAGCTCATC<br>TGTC AATCAAATCCATGTCCTG                    |
| Keap1         | ATTGGCTGTGTGGAGTTGC<br>CAGGTTGAAGAACTCCTCTTGC                     |
| P53           | GTTCCGAGAGCTGAATGAGG<br>ACTTCAGGTGGCTGGAGTGA                      |
| IL10          | 5-CCA AGC CTT ATC GGA AAT GA-3<br>5-AGG G GA GAA ATC GAT GAC AG-3 |
| $\alpha$ -SMA | TTG GAA AAG ATC TGG CAC CAC<br>GCA GTA GTC ACG AAG GAA TAG        |
| <i>GAPDH</i>  | 5'- TGGAAGGACTCATGACCACA-3'<br>5'- ATGATGTTCTGGAGAGCCCC-3'        |
